# Supplementary material
Source: Springer Nature journal article supplement (https://www.springermedizin.de/resource/supplementary/12947_2009_296_MOESM1_ESM.pdf/9556640)
Supplement: MOESM1 [file 9556640]

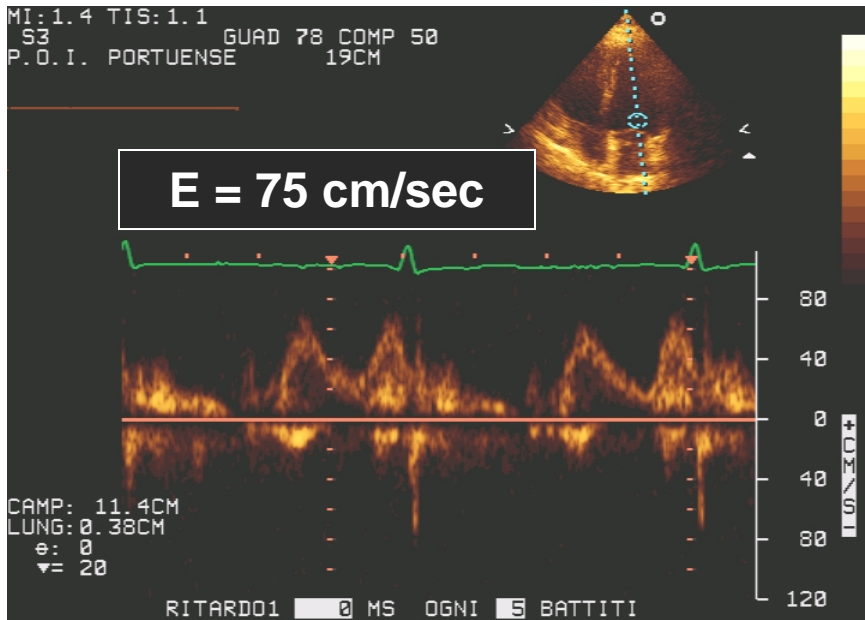

**Mitral flow**

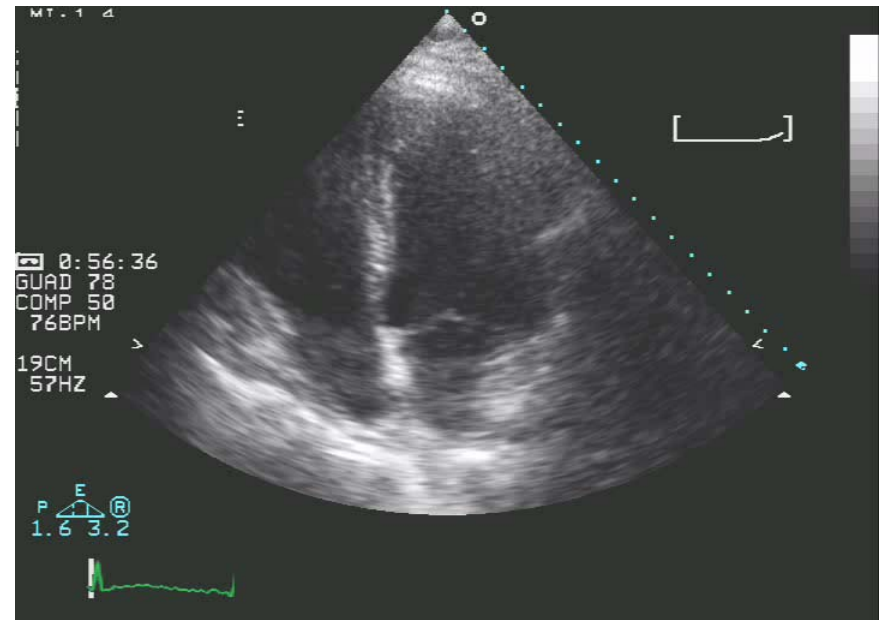

**4-Ch**

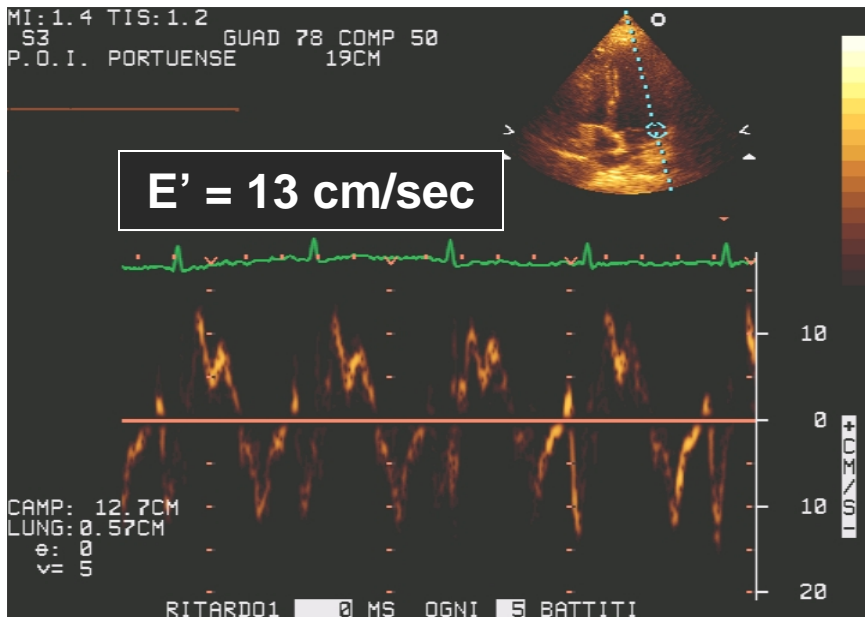

**Mitral annulus - E/E' = 5.7**

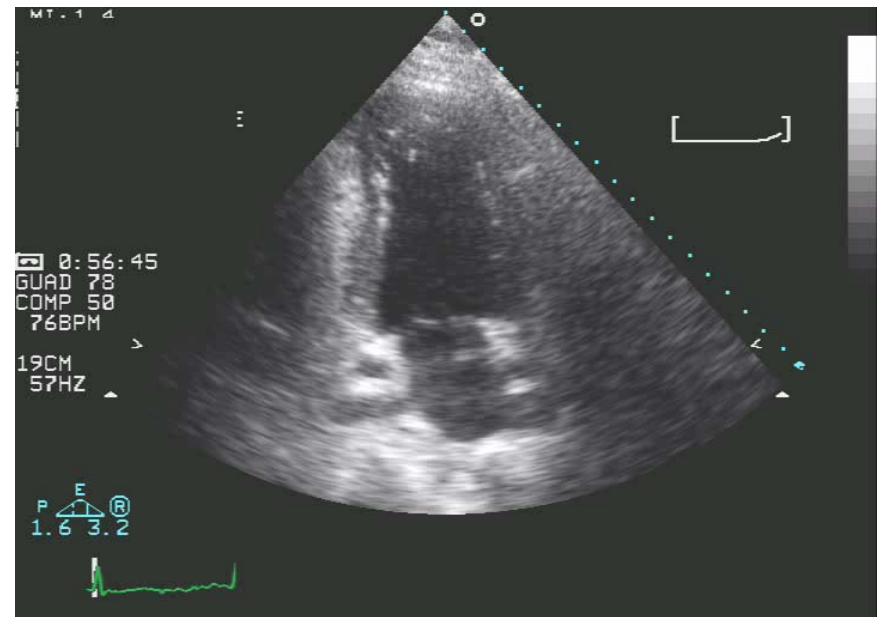

**2-Ch**
